# Supplementary material
Source: publisher site journal article supplement (https://www.dovepress.com/article/357514)
Supplement: Supplementary file 1 [file get_supplementary_file.php]

Appendix 1: IVOC Handover sheets – names and ID are completely made up to serve the purpose of the study

Cycle 1

| Name | Situation | Background | Admission/ EDD | Investigations | Plan |
| --- | --- | --- | --- | --- | --- |
| Anthonia Nicolson  RF568790  3/2/94 | RIF 2/7, vomiting from A+E – not seen as team busy in theatre | Fit and well | D0 admission/ EDD 48h | None requested | To be seen on the wards |
| Costas Antonopoulos  RF765987  8/9/1975 | 45YO male, driving his car at the speed of 45mph, lost control and crashed into a wall. Paramedics found him 30min following the accident | Unknown | ETA A+E | GCS has been 15/15 throughout the time. On arrival HR: 112, BP 110/86, Sats 98% on air, RR 19 | A+E, ETA 3 minutes |
| Berkley Saniston  RF345782  4/8/1953 | D4 elective admission for debulking surgery (TAH BSO, omentectomy) | HTN, Previous mastectomy | D4/ EDD today | Hb 102 (106), Cr 46, Urean 5.7 | Home today  TTA to be done |
| Chantelle Saundridge  RF456890  3/7/89 | Pelvic pain and fever, Had salpingectomy and washout for TOA | Fit and well | D3/ EDD today | Bloods normal | Review and home |
| John Brown  RF876098  5/7/1948 | D4 Elective admission for Hartmann’s procedure | T2DM, HTN on amlodipine | D4/ EDD mane | Hb109 (121) WCC 13 (9) K2.9, Cr 153 Ur 6.8 | Spiked temperature 30min ago |

Cycle 2

| Name | Situation | Background | Admission/ EDD | Investigations | Plan |
| --- | --- | --- | --- | --- | --- |
| Berkley Saniston  RF345731  4/8/1992 | 7h RIF, dizzy and LOC | Fit and well | D0/Unknown | Obs requested | To be seen |
| Costas Antonopoulos  RF765945  8/9/1955 | 3/7 history of abdominal pain, profuse vomiting and constipated | Previous laparotomy for ruptured appendix, and right hemicolectomy, T2DM, HTN | D0/Unknown | Non requested | To be seen – referred 40 min ago |
| Chantelle Saundridge  RF456856  3/7/89 | 4/7 post right hemicolectomy | SLE, HTN, CKD stage 3 | D4/ today | Hb 98(97), Cr 135, Urea 5.7 | TTA to be done  Home today |
| Anthonia Nicolson  RF568756  3/2/90 | fall from 2nd floor had fight with her boyfriend | Unknown | D0/Unknown | On arrival paramedics found her with GCS 15/15, HR 124 BP 96/80, Temp 36.9. 1 IV access been given morphine 7.5 mg IV and I litre of Hartmann’s | TCI ETA 5 minutes |
| John Brown  RF876078  5/7/1948 | 5/7 post adhesiolysis for bowel obstruction | Previous multiple laparotomies following trauma | D5/today | Bloods normal | Review and home |

Cycle 3

| Name | Situation | Background | Admission/ EDD | Investigations | Plan |
| --- | --- | --- | --- | --- | --- |
| Berkley Saniston  RF345731  4/8/1947 | D3 post TAH BSO for G1 endometrial Ca | T2DM, domestic abuse | D3/tomorrow | Hb85 (103)  WCC 11 (9.8)  CRP 80 | Her husband is extremely angry – need to speak to a doctor asap |
| Costas Antonopoulos  RF765945  8/9/1991 | Self-presented in the hospital after being stabbed in the left nipple (2 cm below). | Unknown | D0/unknown | No IV access no analgesia given | To be seen |
| Chantelle Saundridge  RF456856  3/7/89 | 39YO Female was stabbed in the epigastrium. | Unknown | D0/unknown | GCS 15/15 HR 105, BP 107/59 , RR 18 Sats 99%. 1 IV access available, 5.0mg of IV morphine have been given, no IV fluids given | ETA A+E 5 min |
| Anthony Nicolson  RF568756  3/2/90 | D3 post appendicectomy | Fit and well | D0/tomorrow | WCC 15(16)  CRP 153 (143)  T 38 this am | Wants to self-discharge |
| John Brown  RF876078  5/7/1948 | Moped driver in RTC. Deteriorating GCS en route – LAS divert to nearest centre. | Unknown | D0/Unknown | GCS 10/15 5 min ago | ETA A+E 5 min |
